# Supplementary material for: Competition, Technology Licensing-in, and Innovation
Source: Atypon-hosted journal article supplement (doi:10.1287/orsc.2019.1337), 2020-03-11
Supplement: orsc.2019.1337.sm1.pdf [file orsc.2019.1337.sm1.pdf]

| <b>APPENDIX</b>                                                                     |                    |                            |                                   |
|-------------------------------------------------------------------------------------|--------------------|----------------------------|-----------------------------------|
| Table A1 Concordance Pharmaprojects Therapies to Derwent Manual Codes               |                    |                            |                                   |
| Please send comments to: <a href="mailto:tmklueter@iese.edu">tmklueter@iese.edu</a> |                    |                            |                                   |
| Data sources: Dewent, Pharmaprojects                                                |                    |                            |                                   |
| Pharmaprojects                                                                      | Broad Therapy Code |                            |                                   |
| ALIMENTARY/METABOLIC PRODUCTS                                                       | A                  |                            |                                   |
| BLOOD AND CLOTTING PRODUCTS                                                         | B                  |                            |                                   |
| CARDIOVASCULAR PRODUCTS                                                             | C                  |                            |                                   |
| DERMATOLOGICAL PRODUCTS                                                             | D                  |                            |                                   |
| GENITOURINARY                                                                       | G                  |                            |                                   |
| ALIMENTARY/METABOLIC PRODUCTS                                                       | A                  |                            |                                   |
| IMMUNOLOGICAL PRODUCTS                                                              | I                  |                            |                                   |
| ANTI-INFECTIVE PRODUCTS                                                             | J                  |                            |                                   |
| ANTICANCER PRODUCTS                                                                 | K                  |                            |                                   |
| MUSCULOSKELETAL PRODUCTS                                                            | M                  |                            |                                   |
| NEUROLOGICAL PRODUCTS                                                               | N                  |                            |                                   |
| ANTI-INFECTIVE PRODUCTS                                                             | J                  |                            |                                   |
| RESPIRATORY PRODUCTS                                                                | R                  |                            |                                   |
| SENSORY PRODUCTS                                                                    | S                  |                            |                                   |
| MISCELLANEOUS PRODUCTS                                                              | V                  |                            |                                   |
|                                                                                     |                    |                            |                                   |
|                                                                                     |                    |                            |                                   |
| Concordance to Patents                                                              |                    |                            |                                   |
|                                                                                     |                    |                            |                                   |
| Broad Therapy Code                                                                  | DerwentCode        | Description                | comment                           |
| J                                                                                   | B14-A*             | ANTIMICROBIALS             | all subcategories classified as J |
| N                                                                                   | B14-C01            | Analgesic                  |                                   |
| M                                                                                   | B14-C02            | Antigout                   |                                   |
| M                                                                                   | B14-C03            | Antiinflammatory [general] |                                   |
| M                                                                                   | B14-C04            | Antipyretic                |                                   |
| M                                                                                   | B14-C05            | Antihypothermia            |                                   |
| M                                                                                   | B14-C06            | Antirheumatic              |                                   |
| N                                                                                   | B14-C07            | General anaesthetic        |                                   |
| N                                                                                   | B14-C08            | Local anaesthetic          |                                   |

|   |         |                                                              |                                               |
|---|---------|--------------------------------------------------------------|-----------------------------------------------|
| M | B14-C09 | Antiarthritic general and other                              |                                               |
| A | B14-D01 | Hormonal general and other                                   | changed based on input from doctors 20.8.2018 |
| G | B14-D02 | Antihormonal general and other                               |                                               |
| A | B14-D03 | Enzyme inhibitors general and other                          |                                               |
| C | B14-D05 | Antioxidoreductases general and other                        |                                               |
| K | B14-D06 | Antitransferases general and other                           |                                               |
| M | B14-D07 | Antihydrolases general and other                             |                                               |
| K | B14-D08 | Antilyases                                                   |                                               |
| K | B14-D09 | Antiisomerases                                               |                                               |
| A | B14-E*  | Drugs acting on the gastrointestinal system                  | all subcategories classified as A             |
| C | B14-F01 | Cardioactive general and other                               |                                               |
| C | B14-F02 | Circulatory active general and other                         |                                               |
| B | B14-F03 | Antianaemic                                                  |                                               |
| B | B14-F04 | ANTICOAGULANT, ANTIAGGREGANTS, THROMBOLYTIC                  |                                               |
| C | B14-F05 | Reperfusion treatment                                        |                                               |
| C | B14-F06 | Antilipaemic                                                 |                                               |
| C | B14-F07 | Antiarteriosclerotic                                         |                                               |
| B | B14-F08 | Coagulant                                                    |                                               |
| A | B14-F09 | HYPOGLYCAEMIC                                                |                                               |
| A | B14-F10 | Hyperglycaemic                                               |                                               |
| B | B14-F11 | Plasma and blood substitutes                                 |                                               |
| I | B14-G*  | DRUGS ACTING ON THE IMMUNE SYSTEM                            | all subcategories classified as I             |
| K | B14-H*  | ANTICANCER DRUGS                                             | all subcategories classified as K             |
| N | B14-J01 | CNS active general and other                                 |                                               |
| N | B14-J02 | Autonomic NS active general and other                        |                                               |
| N | B14-J03 | Serotonergic*                                                |                                               |
| N | B14-J04 | Antiserotonergic**                                           |                                               |
| C | B14-J05 | Muscular active general and other (inotropic)                | inotropic predominantly C                     |
| N | B14-J06 | Convulsant                                                   |                                               |
| N | B14-J07 | Anticonvulsant                                               |                                               |
| R | B14-K*  | DRUGS ACTING ON THE RESPIRATORY SYSTEM                       | all subcategories classified as R             |
| A | B14-L01 | Agonist/mimetic general and other                            |                                               |
| C | B14-L02 | Angiotensin agonist/mimetic                                  |                                               |
| H | B14-L04 | Prostaglandin, leukotriene, thromboxane agonist/mimetic      |                                               |
| N | B14-L05 | Histaminergic, histamine agonist/mimetic                     |                                               |
| A | B14-L06 | Antagonist/inhibitor/antimetabolite general and other        |                                               |
| H | B14-L08 | Prostaglandin, leukotriene, thromboxane antagonist/inhibitor |                                               |

|          |          |                                                          |                                                                           |
|----------|----------|----------------------------------------------------------|---------------------------------------------------------------------------|
| R        | B14-L09  | Histamine antagonist/inhibitor general and other         |                                                                           |
| R        | B14-L10  | H1 antagonist/inhibitor                                  |                                                                           |
| A        | B14-L11  | H2 antagonist/inhibitor                                  | changed based on input from doctors 20.8.2018                             |
| A        | B14-L12  | Proton pump inhibitors                                   |                                                                           |
| V        | B14-M01  | Antidotes                                                |                                                                           |
| V        | B14-M01D | Antiheavy metal poisoning                                |                                                                           |
| V        | B14-M02  | Pharmaceutical antidote general                          |                                                                           |
| M        | B14-N01  | Bone disorder treatment, osteoporosis                    |                                                                           |
| S        | B14-N02  | Ear disorder treatment                                   |                                                                           |
| S        | B14-N03  | EYE DISORDER TREATMENT GENERAL                           |                                                                           |
| R        | B14-N04  | Nose disorder treatment                                  |                                                                           |
| A        | B14-N05  | Mouth/throat disorder treatment                          |                                                                           |
| A        | B14-N06  | Dental general and other                                 |                                                                           |
| G        | B14-N07  | UROGENITAL/ANORECTAL DISEASE TREATMENT GENERAL AND OTHER |                                                                           |
| C        | B14-N08  | Diuretic                                                 |                                                                           |
| A        | B14-N09  | AntiDiuretic                                             |                                                                           |
| C        | B14-N10  | Kidney                                                   |                                                                           |
| H        | B14-N11  | Thyroid                                                  |                                                                           |
| A        | B14-N12  | Liver                                                    |                                                                           |
| K        | B14-N13  | Pancreas                                                 | Most activity here is cancer based                                        |
| G        | B14-N14  | Uterus                                                   |                                                                           |
| N        | B14-N16  | Brain and spinal cord                                    |                                                                           |
| D        | B14-N17  | SKIN TREATMENT GENERAL AND OTHER                         |                                                                           |
| G        | B14-P*   | DRUGS ACTING ON THE REPRODUCTIVE SYSTEM                  |                                                                           |
| N        | B14-S01  | Multiple sclerosis treatment, demyelinating diseases     |                                                                           |
| A        | B14-S04  | Diabetes (general)                                       |                                                                           |
| B        | B14-S06  | Toxic (septic) shock                                     |                                                                           |
| B        | B14-S07  | Traumatic shock                                          | changed based on input from doctors 20.8.2018                             |
| J        | B14-S11  | Vaccine [general]                                        |                                                                           |
| A        | B14-S13  | Metabolic disorders                                      |                                                                           |
| B        | B14-S06  | Septic Shock                                             |                                                                           |
| A        | B14-S08  | Antioxidant/free radical scavenger                       |                                                                           |
| M        | B14-S14  | Joint disorders general                                  |                                                                           |
| Optional |          |                                                          |                                                                           |
| P        | B14-B    | PESTICIDES AND OTHER ANTIPARASITICS                      | But exclude plant pesticides etc...                                       |
| D        | B14-R    | Cosmetics                                                | Tends to refer to OTC product<br>-best to exclude for innovation studies. |
